# Supplementary material for: Stereoselective synthesis of thailandamide A methyl ester
Source: Royal Society of Chemistry journal article supplement (doi:10.1039/d3ob02107f), 2024-01-01

## **Stereoselective Synthesis of Thailandamide A Methyl Ester**

*Himangshu Sharma, Swapnamoy Ganguly, Moinul Haque Sahana  
and Rajib Kumar Goswami\**

School of Chemical Sciences  
Indian Association for the Cultivation of Science, Jadavpur,  
Kolkata-700032, India.  
Email: [ocrkg@iacs.res.in](mailto:ocrkg@iacs.res.in)

### **Supporting Information**

## Contents

|                                                                                                                                                            |           |
|------------------------------------------------------------------------------------------------------------------------------------------------------------|-----------|
| <i>1.1. Figure S1: Key 2D-NMR correlations and structural confirmation of thailandamide A methyl ester (4) .....</i>                                       | <i>S3</i> |
| <i>2.1. Table S-1. Comparison of the <sup>1</sup>H NMR spectra (MeOD-d<sub>4</sub>) of synthetic methyl ester 4 and isolated acid 1<sup>1</sup> .....</i>  | <i>S4</i> |
| <i>2.2. Table S-2. Comparison of the <sup>13</sup>C NMR spectra (MeOD-d<sub>4</sub>) of synthetic methyl ester 4 and isolated acid 1<sup>1</sup> .....</i> | <i>S5</i> |
| <i>Figure S2 : UV-VIS spectrum of synthetic thailandamide A methyl ester 4 and natural thailandamide A 1<sup>1</sup> in methanol: .....</i>                | <i>S7</i> |
| <i>3.1. Table S-3. Initial efforts towards the hydrolysis of methyl ester of thailandamide A : .....</i>                                                   | <i>S7</i> |
| <i>4.1. Copies of <sup>1</sup>H NMR, <sup>13</sup>C NMR, 2D NMR, UV-VIS and HRMS spectra .....</i>                                                         | <i>S8</i> |

**1.1. Figure S1: Key 2D-NMR correlations and structural confirmation of thailandamide A methyl ester (4)**

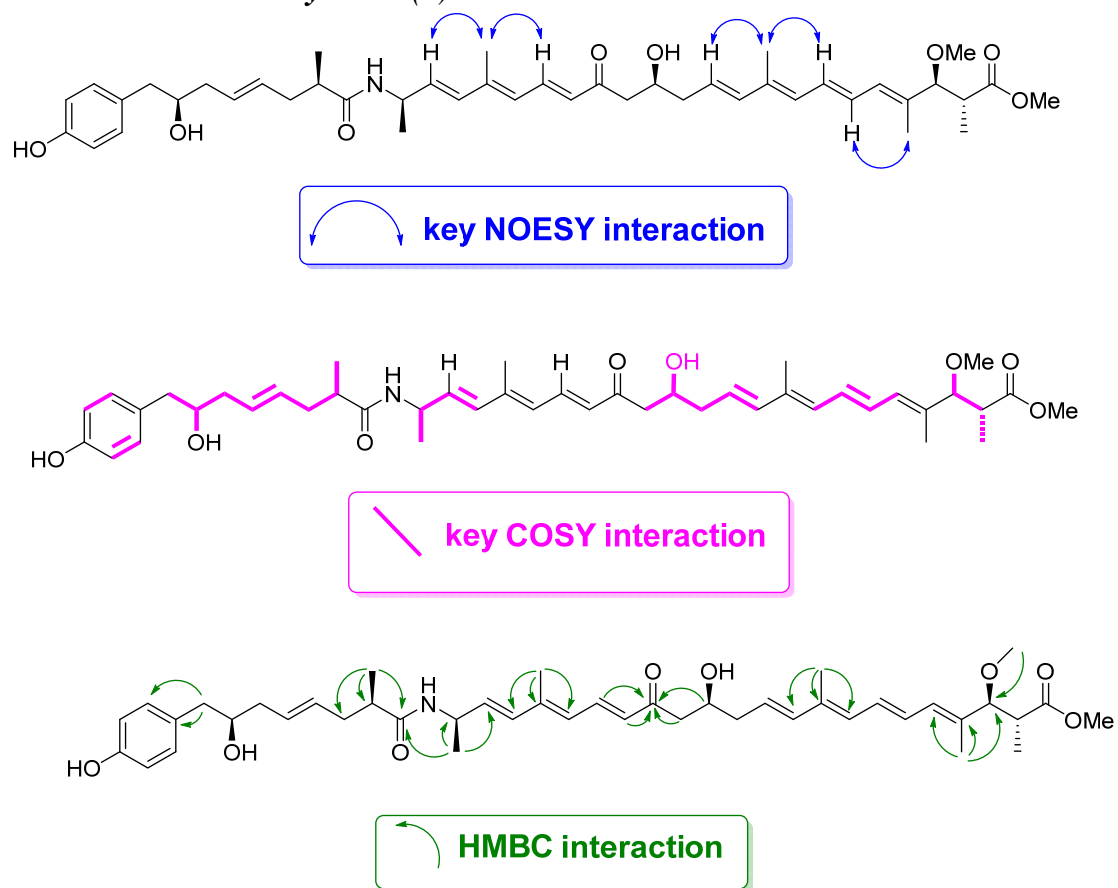

**2.1. Table S-1. Comparison of the <sup>1</sup>H NMR spectra (MeOD-*d*<sub>4</sub>) of synthetic methyl ester 4 and isolated acid 1<sup>1</sup>**

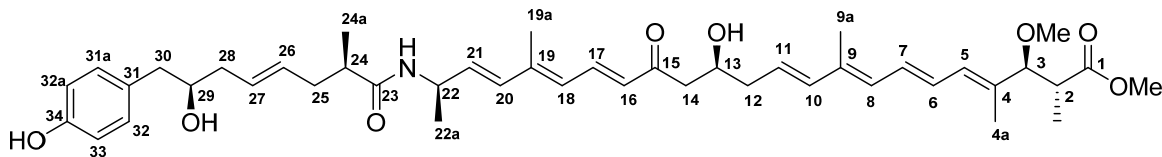

| Position  | $\delta$ <sup>1</sup> H [ppm]<br>(Natural)<br>(MeOD- <i>d</i> <sub>4</sub> ) | $\delta$ <sup>1</sup> H [ppm]<br>(Synthetic)<br>(500 MHz,<br>MeOD- <i>d</i> <sub>4</sub> ) | $\Delta\delta$ |
|-----------|------------------------------------------------------------------------------|--------------------------------------------------------------------------------------------|----------------|
| <b>1</b>  |                                                                              |                                                                                            |                |
| <b>2</b>  | 2.57 (m)                                                                     | 2.65-2.62 (m)                                                                              | 0.06           |
| <b>3</b>  | 3.66 (m)                                                                     | 3.67 (d, 4.4)                                                                              | 0.01           |
| <b>4</b>  |                                                                              |                                                                                            |                |
| <b>5</b>  | 6.18 (m)                                                                     | 6.19 (d, 1.8)                                                                              | 0.01           |
| <b>6</b>  | 6.49 (dd 14.5, 11.1)                                                         | 6.50 (dd, 14.5, 11.1)                                                                      | 0.01           |
| <b>7</b>  | 6.63 (dd 14.5, 11.1)                                                         | 6.66-6.60 (m)                                                                              | 0.0            |
| <b>8</b>  | 6.10 (d 11.1)                                                                | 6.11 (d, 11.2)                                                                             | 0.01           |
| <b>9</b>  |                                                                              |                                                                                            |                |
| <b>10</b> | 6.19 (m)                                                                     | 6.23-6.19 (m)                                                                              | 0.02           |
| <b>11</b> | 5.80 (dt 15.4, 7.2)                                                          | 5.79 (dt, 15.3, 7.4)                                                                       | 0.01           |
| <b>12</b> | 2.35 (m)                                                                     | 2.38-2.34 (m)                                                                              | 0.01           |
| <b>13</b> | 4.15 (m)                                                                     | 4.16 (tdd, 11.7, 8.8, 5.8)                                                                 | 0.01           |
| <b>14</b> | 2.75 (m)                                                                     | 2.75 (dq, 9.0, 4.8, 4.2)                                                                   | 0.0            |
| <b>15</b> |                                                                              |                                                                                            |                |
| <b>16</b> | 6.24 (d 15.1)                                                                | 6.25 (d, 9.5)                                                                              | 0.01           |
| <b>17</b> | 7.62 (dd 15.1, 11.8)                                                         | 7.63 (dd, 15.1, 11.8)                                                                      | 0.01           |
| <b>18</b> | 6.19 (m)                                                                     | 6.23-6.19 (m)                                                                              | 0.02           |
| <b>19</b> |                                                                              |                                                                                            |                |
| <b>20</b> | 6.26 (d 15.7)                                                                | 6.28 (d, 11.0)                                                                             | 0.02           |
| <b>21</b> | 5.94 (dd 15.7, 6.0)                                                          | 5.93 (dd, 15.8, 6.1)                                                                       | -0.01          |
| <b>22</b> | 4.54 (m)                                                                     | 4.55 (td, 7.2, 3.5)                                                                        | 0.01           |
| <b>23</b> |                                                                              |                                                                                            |                |
| <b>24</b> | 2.36 (m)                                                                     | 2.41-2.37 (m)                                                                              | 0.03           |

|                                |                     |                                 |              |
|--------------------------------|---------------------|---------------------------------|--------------|
| <b>25</b>                      | 2.08 (m), 2.29 (m)  | 2.09-2.07 (m) ,<br>2.3-2.26 (m) | 0.0, -0.01   |
| <b>26</b>                      | 5.43 (dt 15.2, 6.7) | 5.45-5.39 (m)                   | -0.01        |
| <b>27</b>                      | 5.53 (dt 15.2, 6.7) | 5.55-5.45 (m)                   | -0.03        |
| <b>28</b>                      | 2.06 (m), 2.12 (m)  | 2.07-2.03 (m),<br>2.12-2.09 (m) | -0.01, -0.01 |
| <b>29</b>                      | 3.68 (m)            | 3.67-3.64 (m)                   | -0.02        |
| <b>30</b>                      | 2.58 (m)            | 2.59-2.56 (m)                   | -0.005       |
| <b>31</b>                      |                     |                                 |              |
| <b>32,32a</b>                  | 6.98 (d 8.3)        | 6.98 (8.4)                      | 0.0          |
| <b>33,33a</b>                  | 6.69 (d 8.3)        | 6.69 (d, 8.4)                   | 0.0          |
| <b>34</b>                      |                     |                                 |              |
| <b>2a</b>                      | 0.94 (d 7.0)        | 0.93 (d, 7.2)                   | -0.01        |
| <b>3a</b>                      | 3.14 (s)            | 3.12 (s)                        | -0.02        |
| <b>4a</b>                      | 1.67 (s)            | 1.67 (s)                        | 0.0          |
| <b>9a</b>                      | 1.88 (s)            | 1.89 (s)                        | 0.01         |
| <b>19a</b>                     | 1.95 (s)            | 1.95 (s)                        | 0.0          |
| <b>22a</b>                     | 1.24 (d 6.7)        | 1.24 (d, 6.9)                   | 0.0          |
| <b>24a</b>                     | 1.09 (d 6.8)        | 1.1 (d, 6.8)                    | 0.01         |
| <b>NH</b>                      |                     |                                 |              |
| <b>CH<sub>3</sub> of ester</b> |                     | 3.68 (s)                        |              |

**2.2. Table S-2. Comparison of the <sup>13</sup>C NMR spectra (MeOD-*d*<sub>4</sub>) of synthetic methyl ester 4 and isolated acid 1<sup>1</sup>**

| <b>Position</b> | <b>δ <sup>13</sup>C [ppm]<br/>(Natural)<br/>(MeOD-<i>d</i><sub>4</sub>)</b> | <b>δ <sup>13</sup>C [ppm]<br/>(Synthetic)<br/>(500 MHz,<br/>MeOD-<i>d</i><sub>4</sub>)</b> | <b>Δδ</b> | <b>Δδ -<br/>0.1ppm**</b> |
|-----------------|-----------------------------------------------------------------------------|--------------------------------------------------------------------------------------------|-----------|--------------------------|
| <b>4a</b>       | 11.0                                                                        | 11.1                                                                                       | 0.1       | 0.0                      |
| <b>9a</b>       | 12.9                                                                        | 13.0                                                                                       | 0.1       | 0.0                      |
| <b>19a</b>      | 13.4                                                                        | 13.5                                                                                       | 0.1       | 0.0                      |
| <b>2a</b>       | 14.7                                                                        | 14.7                                                                                       | 0.0       | -0.1                     |
| <b>24a</b>      | 18.0                                                                        | 18.2                                                                                       | 0.2       | 0.1                      |
| <b>22a</b>      | 20.8                                                                        | 21.0                                                                                       | 0.2       | 0.1                      |
| <b>25</b>       | 38.5                                                                        | 38.6                                                                                       | 0.1       | 0.0                      |
| <b>28</b>       | 41.0                                                                        | 41.1                                                                                       | 0.1       | 0.0                      |
| <b>12</b>       | 42.1                                                                        | 42.2                                                                                       | 0.1       | 0.0                      |
| <b>24</b>       | 42.3                                                                        | 42.4                                                                                       | 0.1       | 0.0                      |

|                                |       |       |      |      |
|--------------------------------|-------|-------|------|------|
| <b>30</b>                      | 43.4  | 43.5  | 0.1  | 0.0  |
| <b>2</b>                       | 44.4  | 44.4  | 0.0  | -0.1 |
| <b>22</b>                      | 47.7  | 47.8  | 0.1  | 0.0  |
| <b>14</b>                      | 48.4  | 47.9  | -0.5 | -0.6 |
| <b>3a</b>                      | 56.5  | 56.6  | 0.1  | 0.0  |
| <b>13</b>                      | 69.5  | 69.6  | 0.1  | 0.0  |
| <b>29</b>                      | 73.7  | 73.8  | 0.1  | 0.0  |
| <b>3</b>                       | 91.0  | 91.1  | 0.1  | 0.0  |
| <b>33,33a</b>                  | 116.1 | 116.2 | 0.1  | 0.0  |
| <b>11</b>                      | 126.6 | 126.8 | 0.2  | 0.1  |
| <b>6</b>                       | 129.0 | 129.1 | 0.1  | 0.0  |
| <b>18</b>                      | 129.9 | 130.0 | 0.1  | 0.0  |
| <b>27</b>                      | 130.0 | 130.1 | 0.1  | 0.0  |
| <b>16</b>                      | 130.8 | 130.9 | 0.1  | 0.0  |
| <b>26</b>                      | 131.2 | 131.3 | 0.1  | 0.0  |
| <b>31</b>                      | 131.3 | 131.5 | 0.2  | 0.1  |
| <b>8</b>                       | 131.4 | 131.5 | 0.1  | 0.1  |
| <b>7</b>                       | 131.5 | 131.7 | 0.2  | 0.1  |
| <b>32,32a</b>                  | 131.5 | 131.6 | 0.1  | 0.0  |
| <b>5</b>                       | 132.9 | 133.1 | 0.2  | 0.1  |
| <b>20</b>                      | 134.4 | 134.5 | 0.1  | 0.0  |
| <b>4</b>                       | 134.8 | 134.7 | -0.1 | -0.2 |
| <b>21</b>                      | 136.1 | 136.2 | 0.1  | 0.0  |
| <b>9</b>                       | 137.0 | 137.2 | 0.2  | 0.1  |
| <b>10</b>                      | 138.8 | 138.9 | 0.1  | 0.0  |
| <b>17</b>                      | 140.5 | 140.5 | 0.0  | -0.1 |
| <b>19</b>                      | 146.3 | 146.4 | 0.1  | 0.0  |
| <b>34</b>                      | 156.7 | 156.8 | 0.1  | 0.0  |
| <b>23</b>                      | 178.0 | 177.9 | -0.1 | -0.2 |
| <b>1</b>                       | 179.5 | 178.2 | -1.3 | -1.4 |
| <b>15</b>                      | 201.8 | 201.9 | 0.1  | 0.0  |
| <b>CH<sub>3</sub> of ester</b> |       | 52.3  |      |      |

\*\* Corrected for what seems to be a systematic drift of ca. – 0.1 ppm

**Figure S2 : UV-VIS spectrum of synthetic thailandamide A methyl ester 4 and natural thailandamide A 1<sup>1</sup> in methanol:**

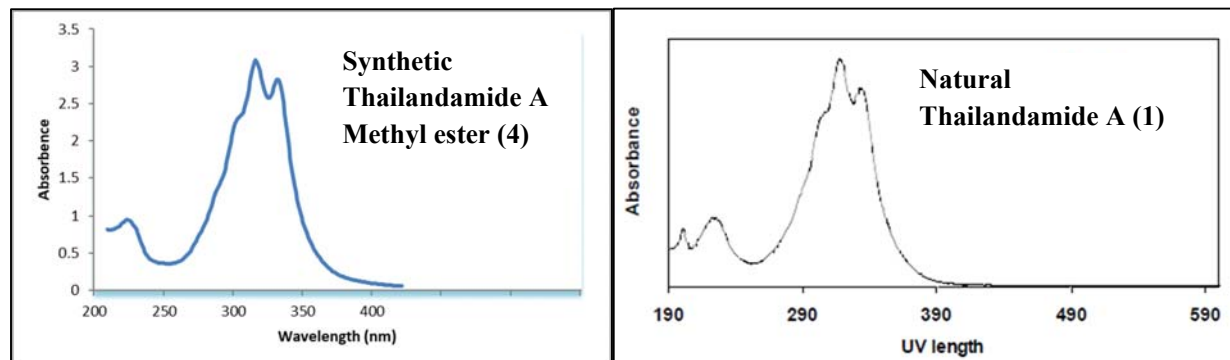

**3.1. Table S-3. Initial efforts towards the hydrolysis of methyl ester of thailandamide A :**

| Entry | Conditions                                           | Result                                |
|-------|------------------------------------------------------|---------------------------------------|
| 1     | LiOH, THF:H <sub>2</sub> O:MeOH(3:1:1), 0 °C, 30 min | Decomposed                            |
| 2     | Me <sub>3</sub> SnOH, DCE, 60 °C, 6 h                | Decomposed                            |
| 3     | TMSOK, THF, rt, 10 min                               | Trace (Product characterised by HRMS) |

## ***Reference***

1. Nguyen, T.; Ishida, K.; Jenke-Kodama, H.; Dittmann, E.; Gurgui, C.; Hochmuth, T.; Taudien, S.; Platzer, M.; Hertweck, C.; Piel, J. Exploiting the mosaic structure of trans-acyltransferase polyketide synthases for natural product discovery and pathway dissection. *Nat. Biotechnol.* **2008**, *26*, 225-233.

### ***4.1. Copies of $^1\text{H}$ NMR, $^{13}\text{C}$ NMR, 2D NMR, UV-VIS and HRMS spectra***



**<sup>1</sup>H NMR spectrum of compound 10 (300 MHz, CDCl<sub>3</sub>):**

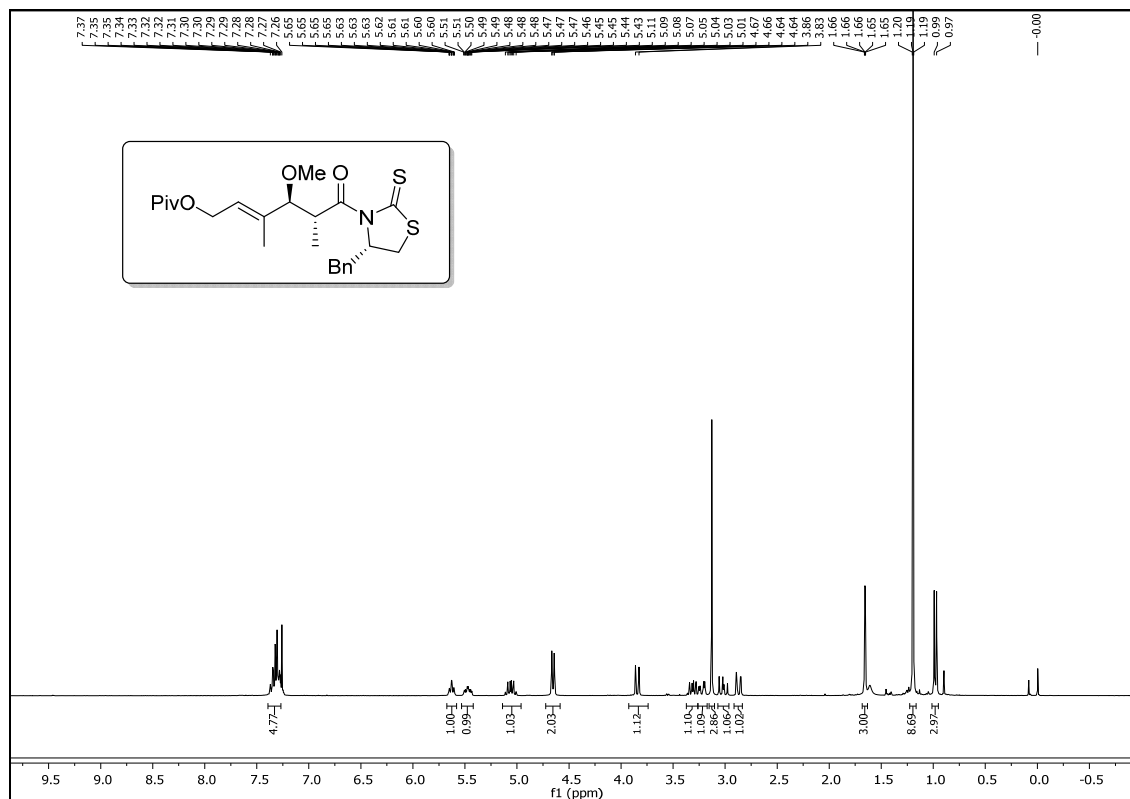

**<sup>13</sup>C NMR spectrum of compound 10 (75 MHz, CDCl<sub>3</sub>):**

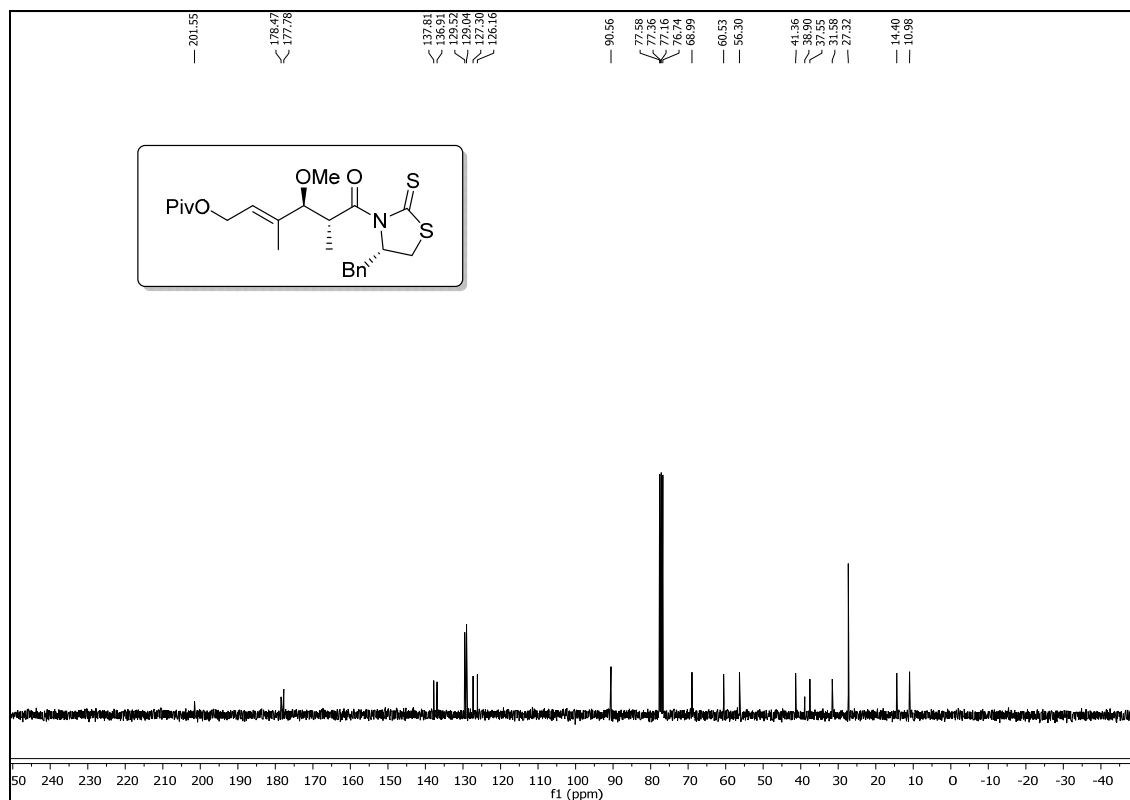

**<sup>1</sup>H NMR spectrum of compound 11 (300 MHz, CDCl<sub>3</sub>):**

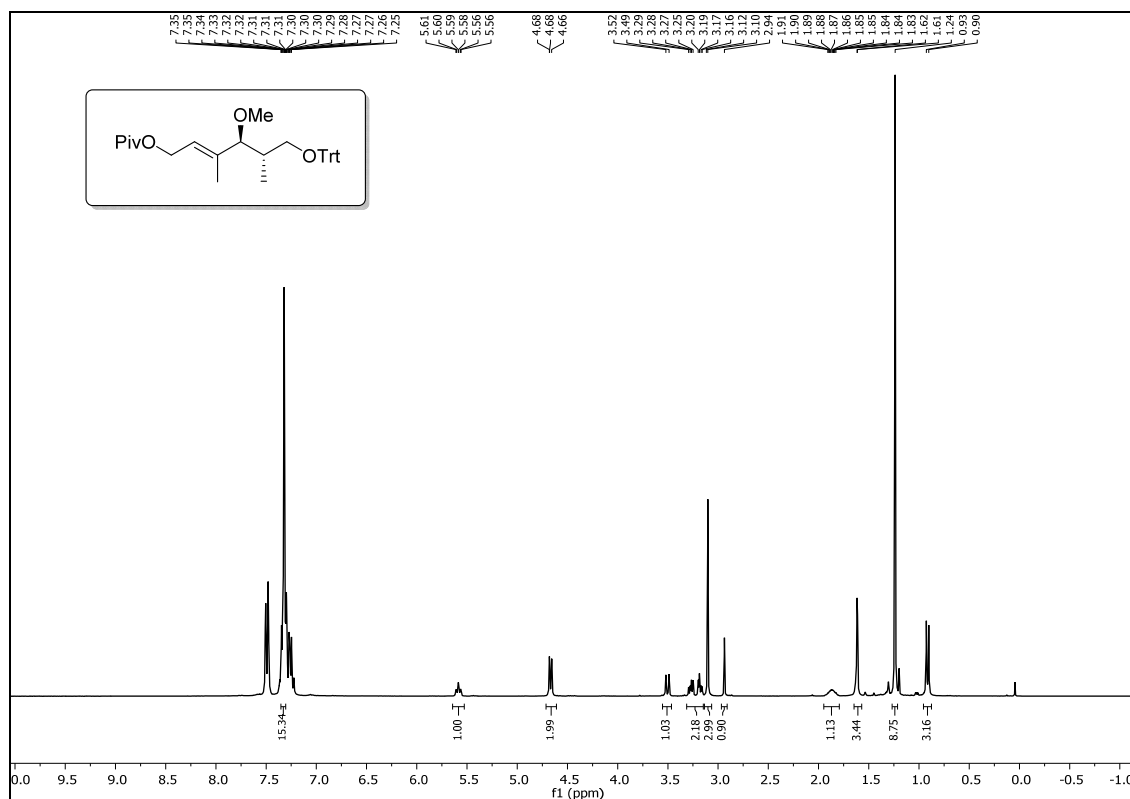

**<sup>13</sup>C NMR spectrum of compound 11 (75 MHz, CDCl<sub>3</sub>):**

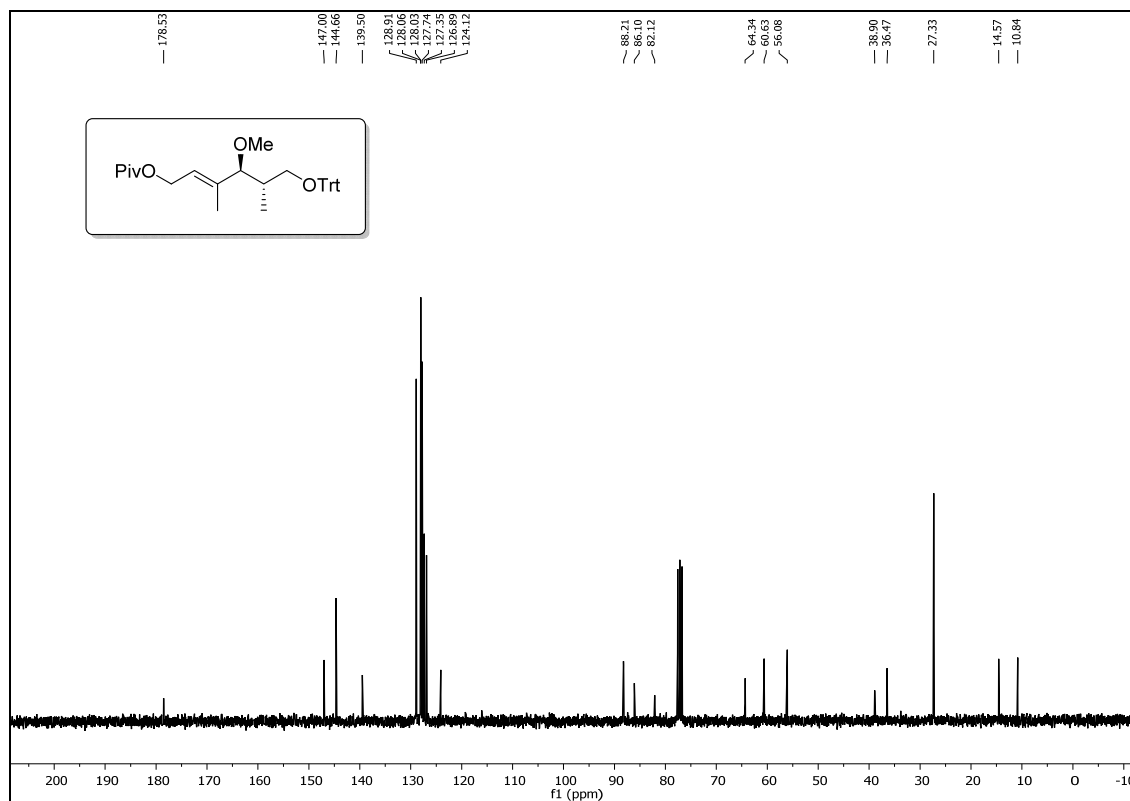

**<sup>1</sup>H NMR spectrum of pivaloyl deprotected product of compound 11 (300 MHz, CDCl<sub>3</sub>):**

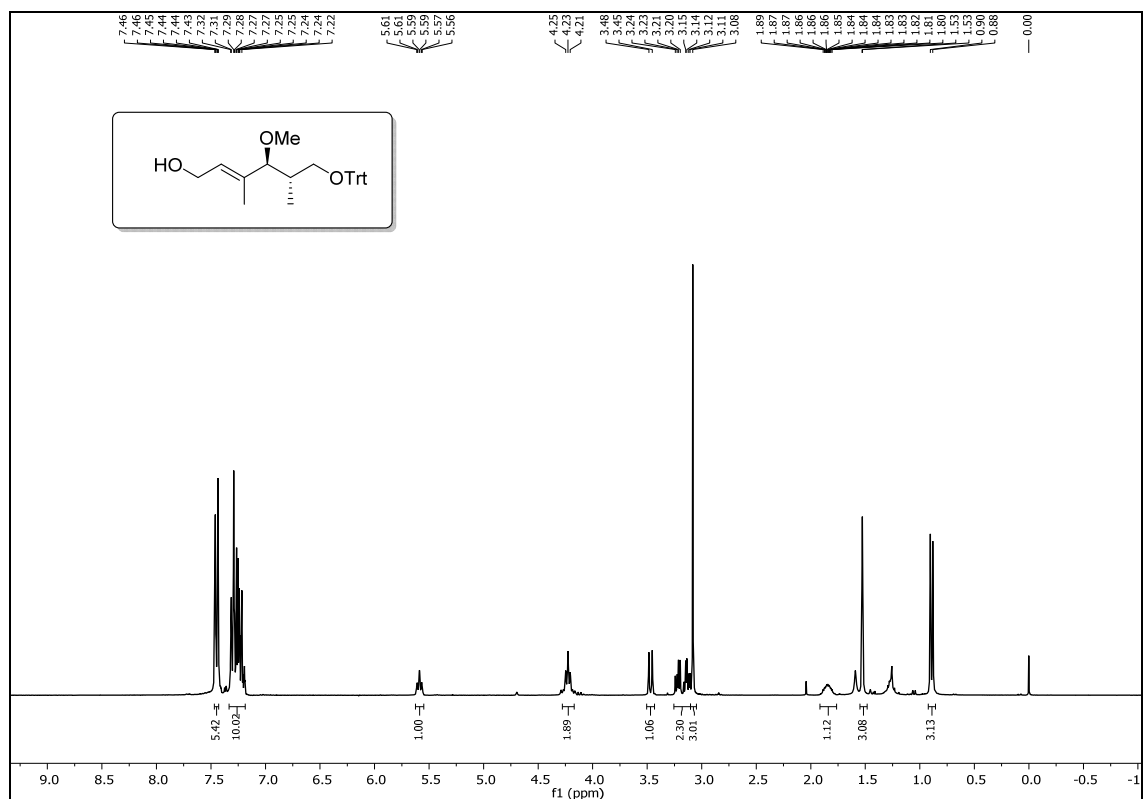

**<sup>13</sup>C NMR spectrum of pivaloyl deprotected product of compound 11 (75 MHz, CDCl<sub>3</sub>):**

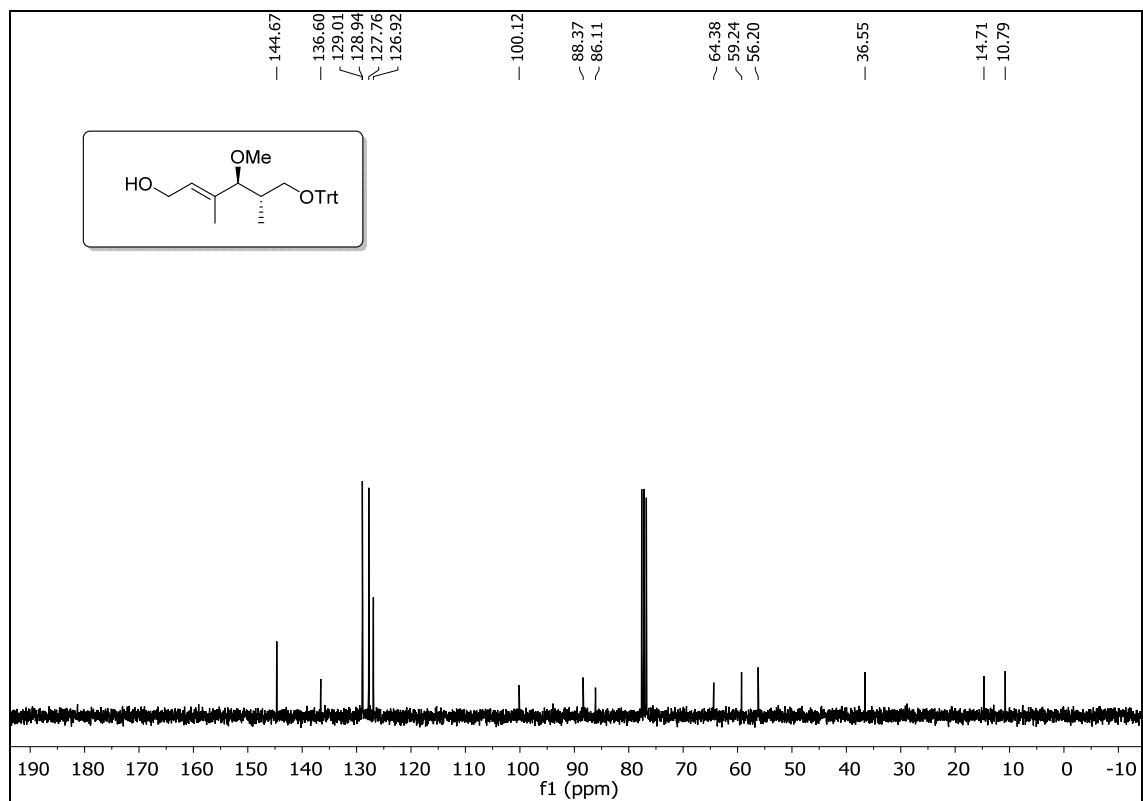















**<sup>1</sup>H NMR spectrum of compound 18 (300 MHz, CDCl<sub>3</sub>):**

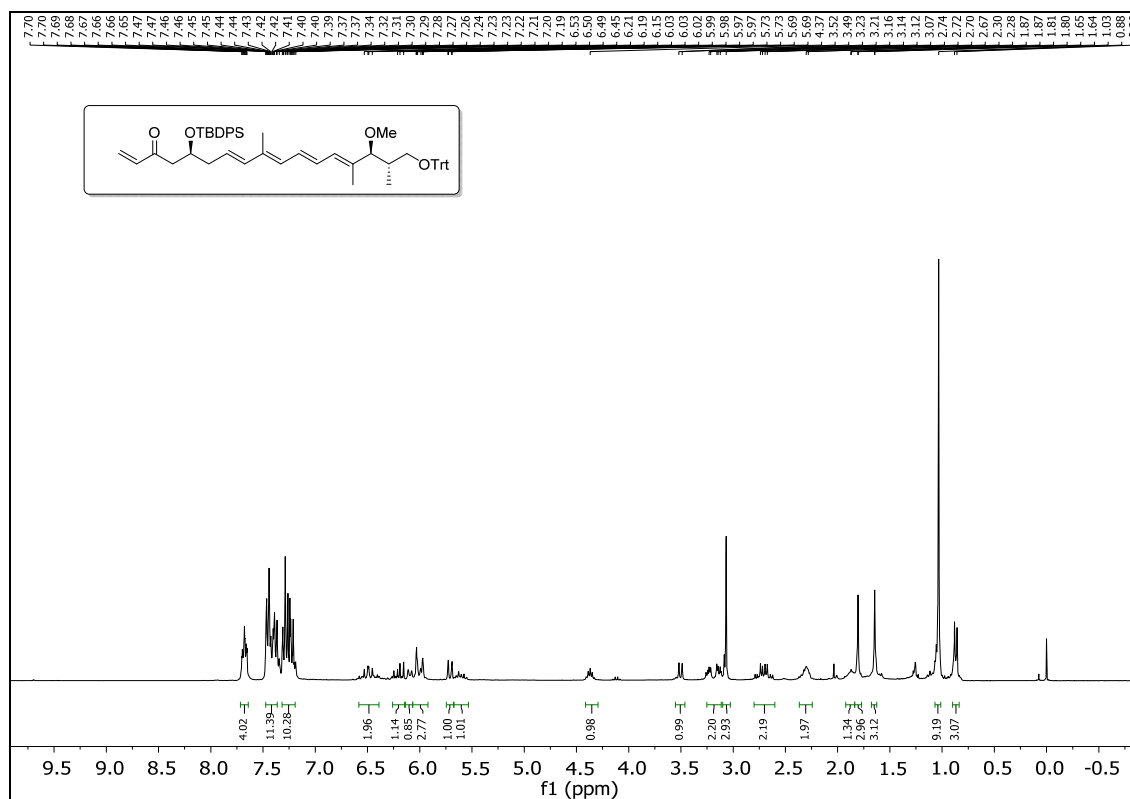

**<sup>13</sup>C NMR spectrum of compound 18 (75 MHz, CDCl<sub>3</sub>):**

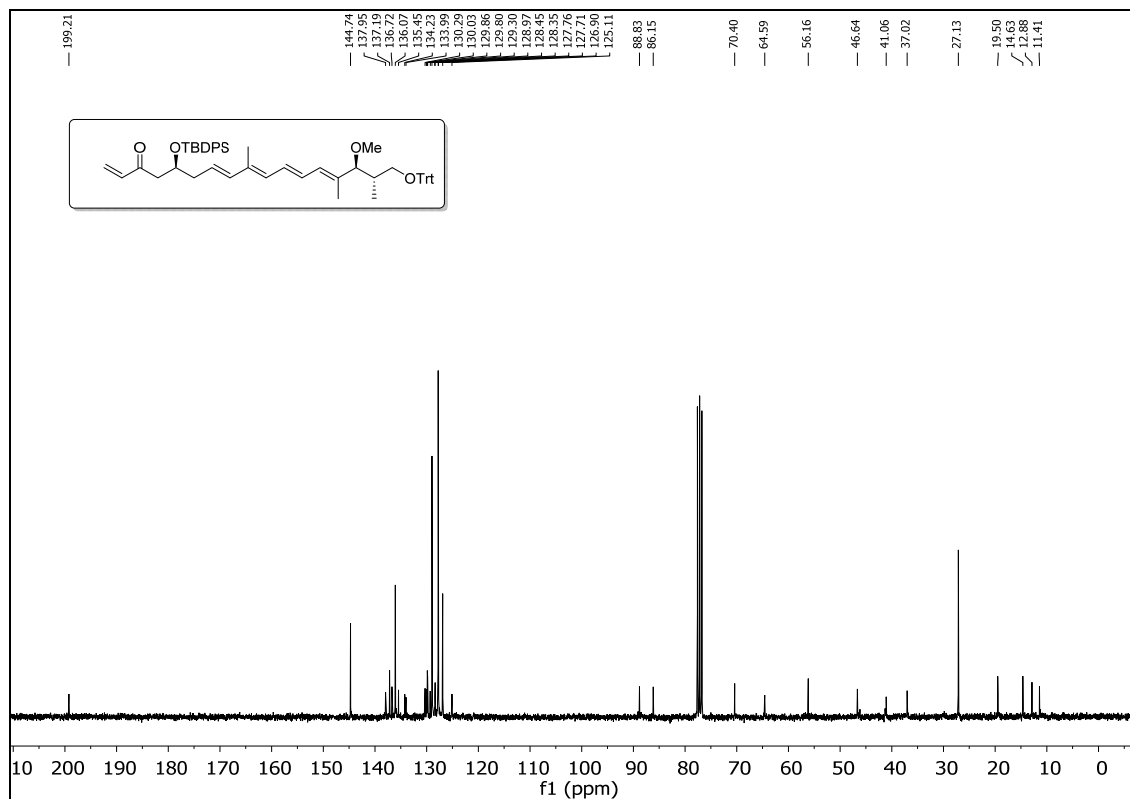



**$^{13}\text{C}$  NMR spectrum of compound 19 (75 MHz,  $\text{CDCl}_3$ ):**

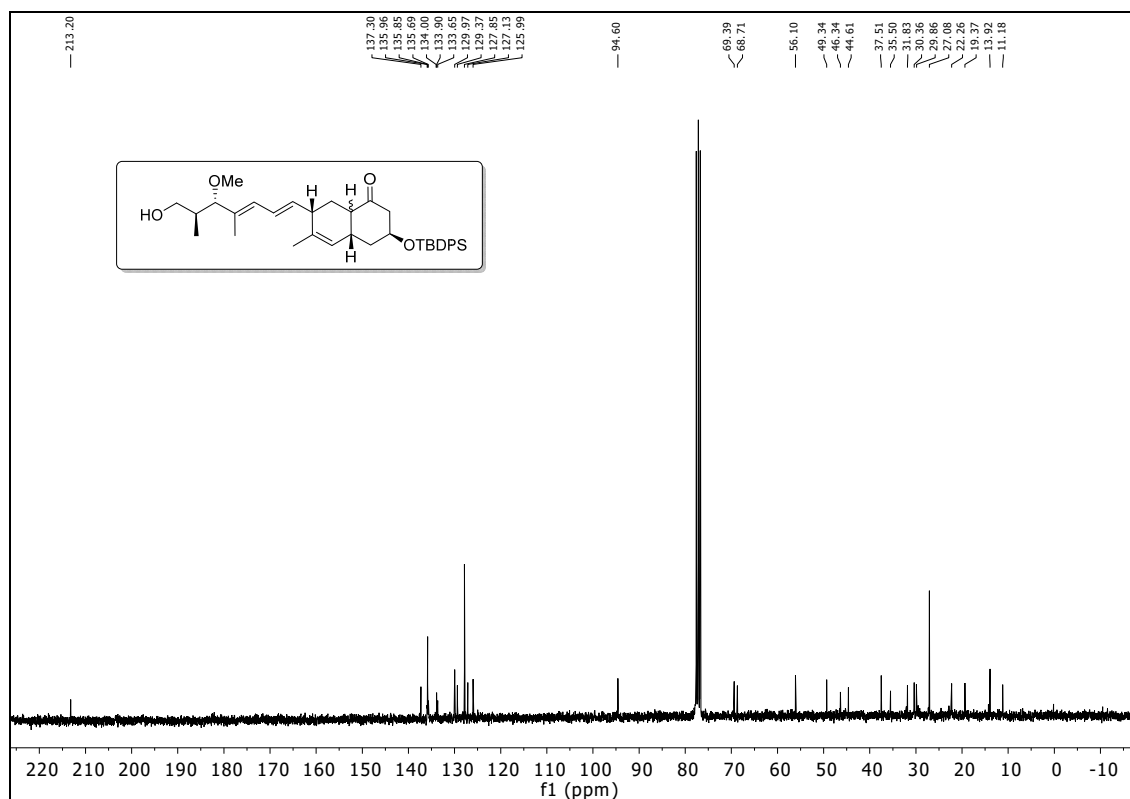

**FT-IR spectrum of compound 19 :**

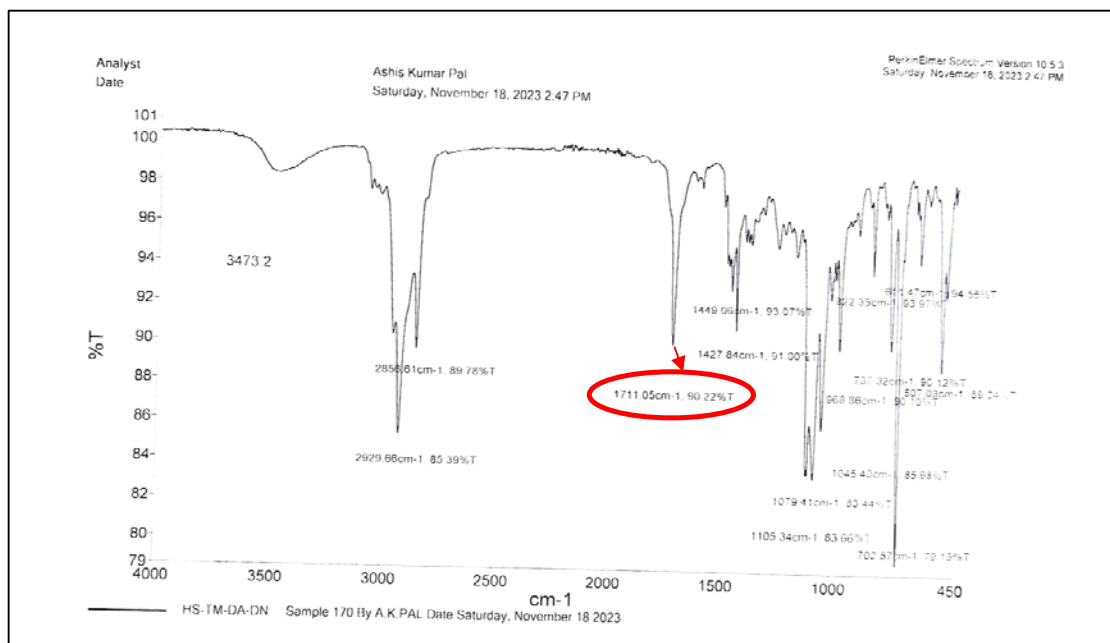

**<sup>1</sup>H NMR spectrum of compound 24 (300 MHz, CDCl<sub>3</sub>):**

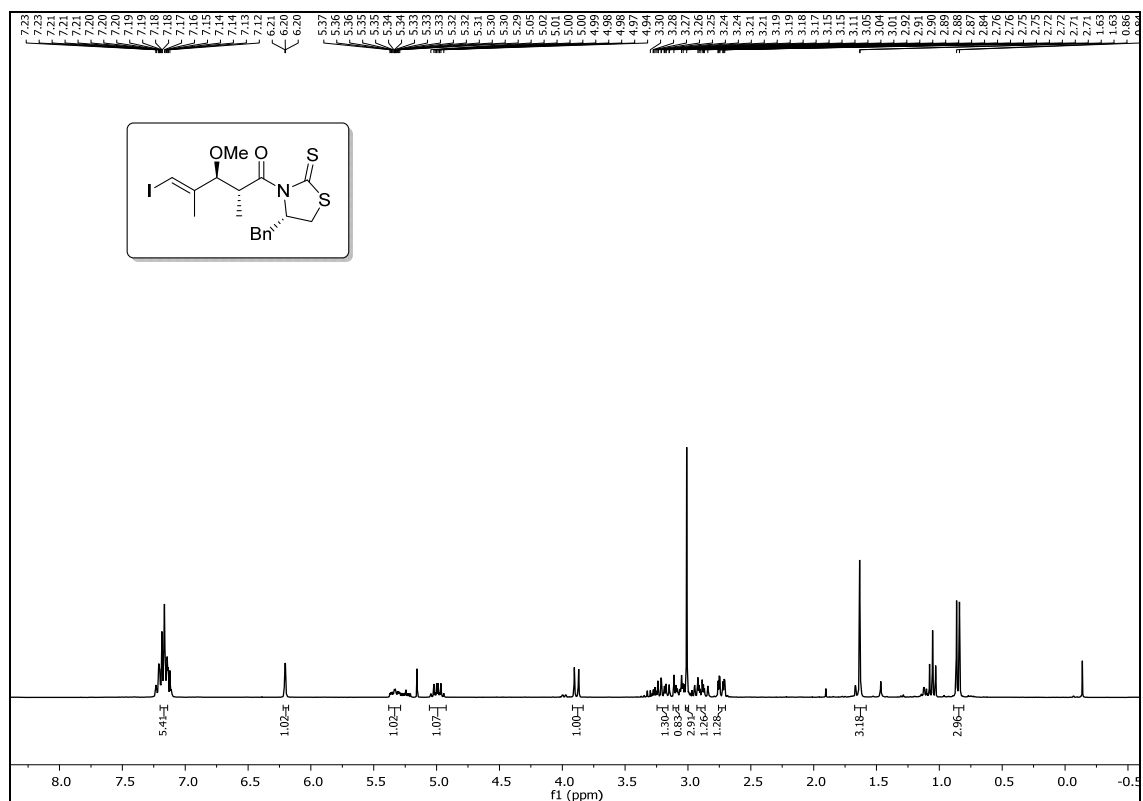

**<sup>13</sup>C NMR spectrum of compound 24 (75 MHz, CDCl<sub>3</sub>):**

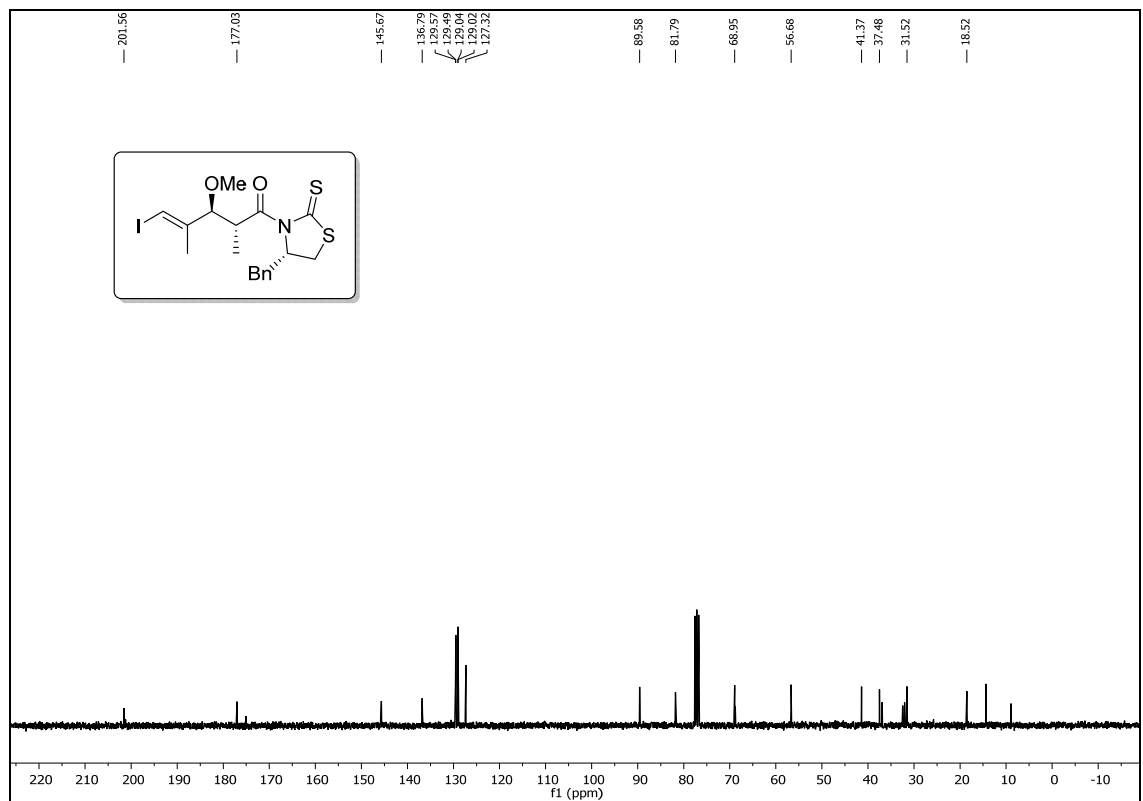

**<sup>1</sup>H NMR spectrum of compound 20 (300 MHz, CDCl<sub>3</sub>):**

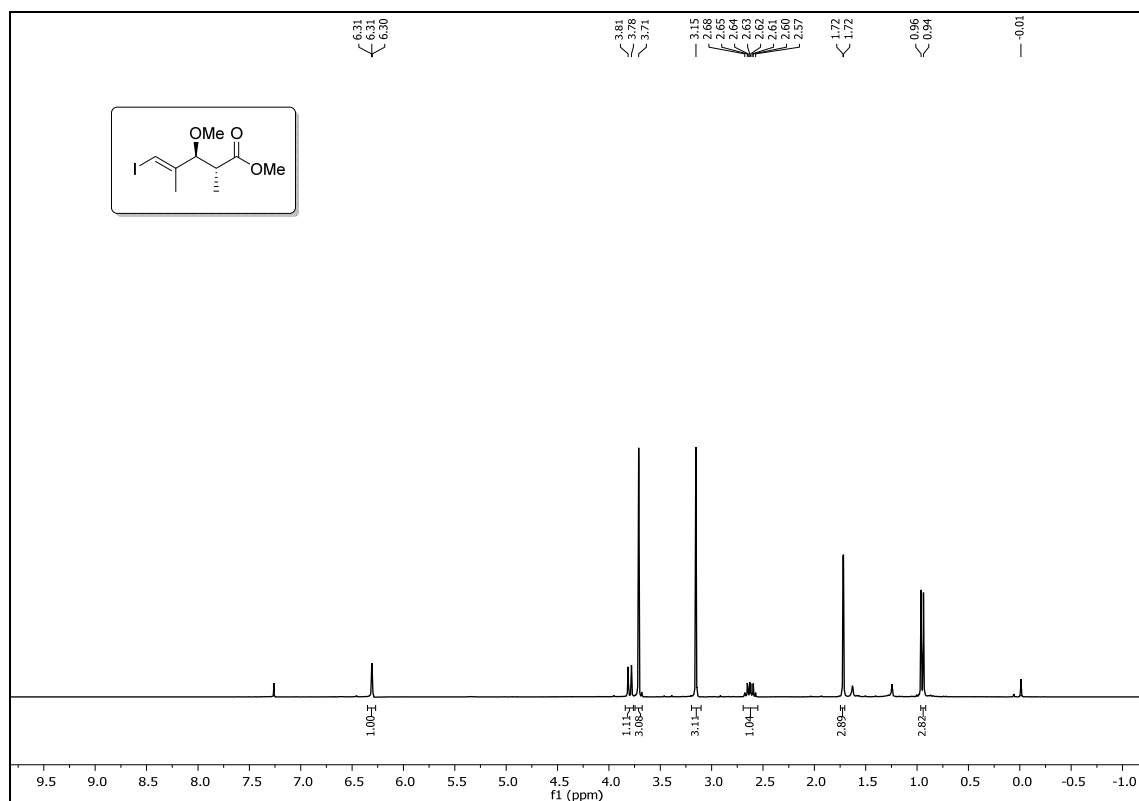

**<sup>13</sup>C NMR spectrum of compound 20 (75 MHz, CDCl<sub>3</sub>):**

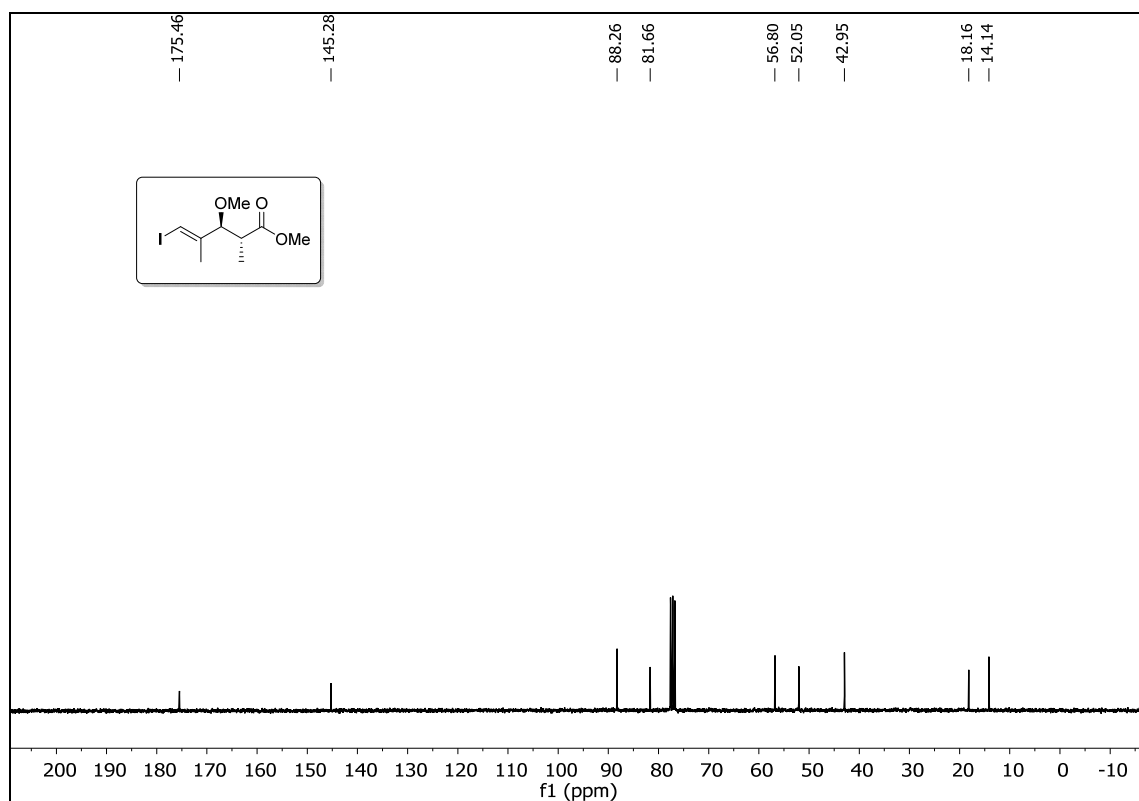

**<sup>1</sup>H NMR spectrum of compound 27 (300 MHz, CDCl<sub>3</sub>):**

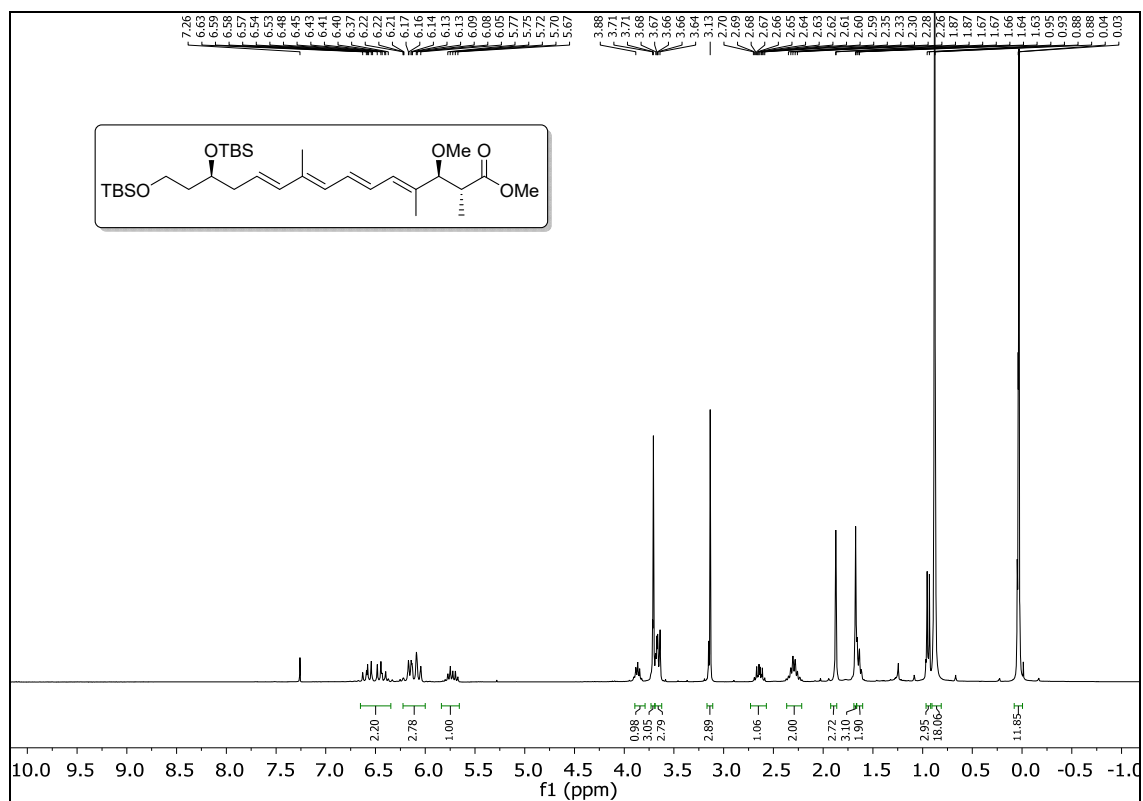

**<sup>13</sup>C NMR spectrum of compound 27 (75 MHz, CDCl<sub>3</sub>):**

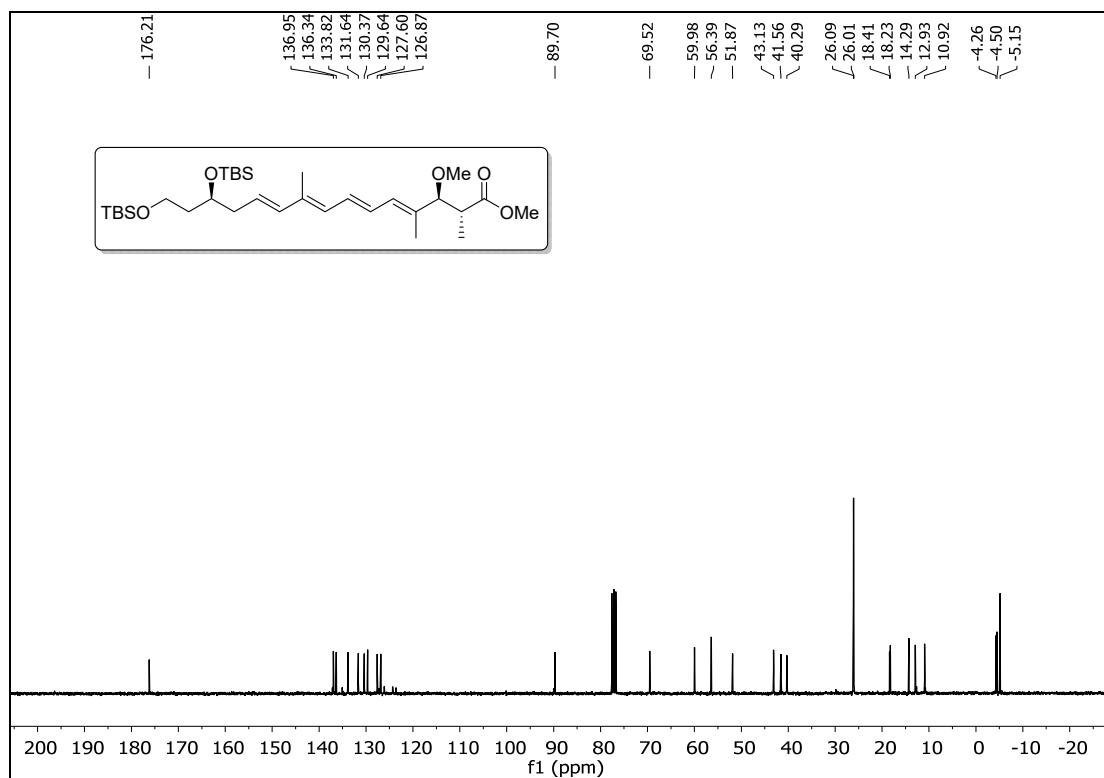





**<sup>1</sup>H NMR spectrum of compound 28 (300 MHz, CDCl<sub>3</sub>):**

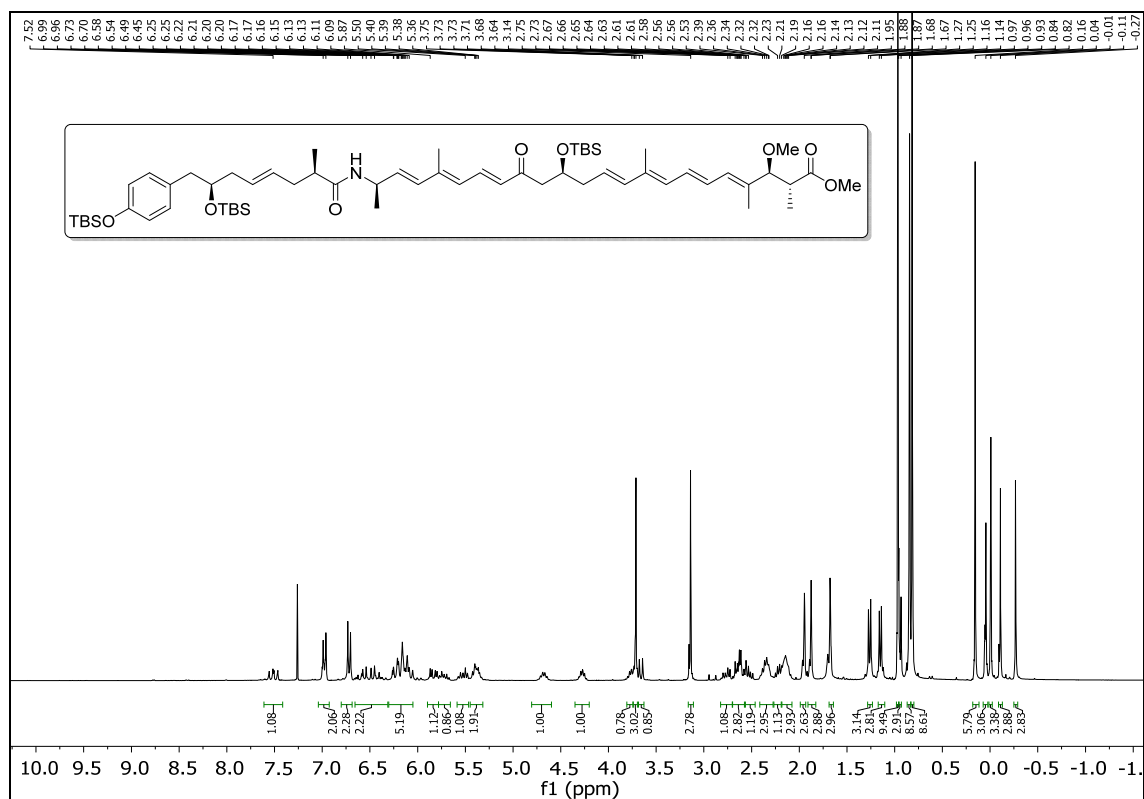

**<sup>13</sup>C NMR spectrum of compound 28 (75 MHz, CDCl<sub>3</sub>):**

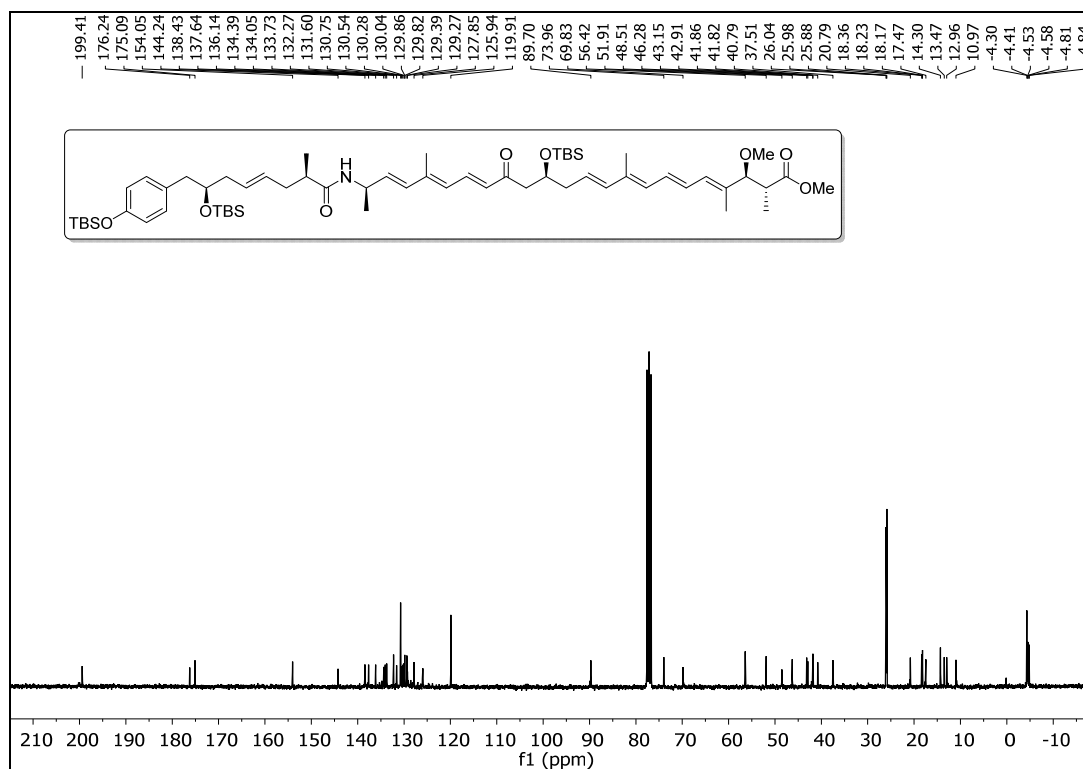



**DEPT spectrum of compound 4 (75 MHz, MeOD-*d*<sub>4</sub>):**

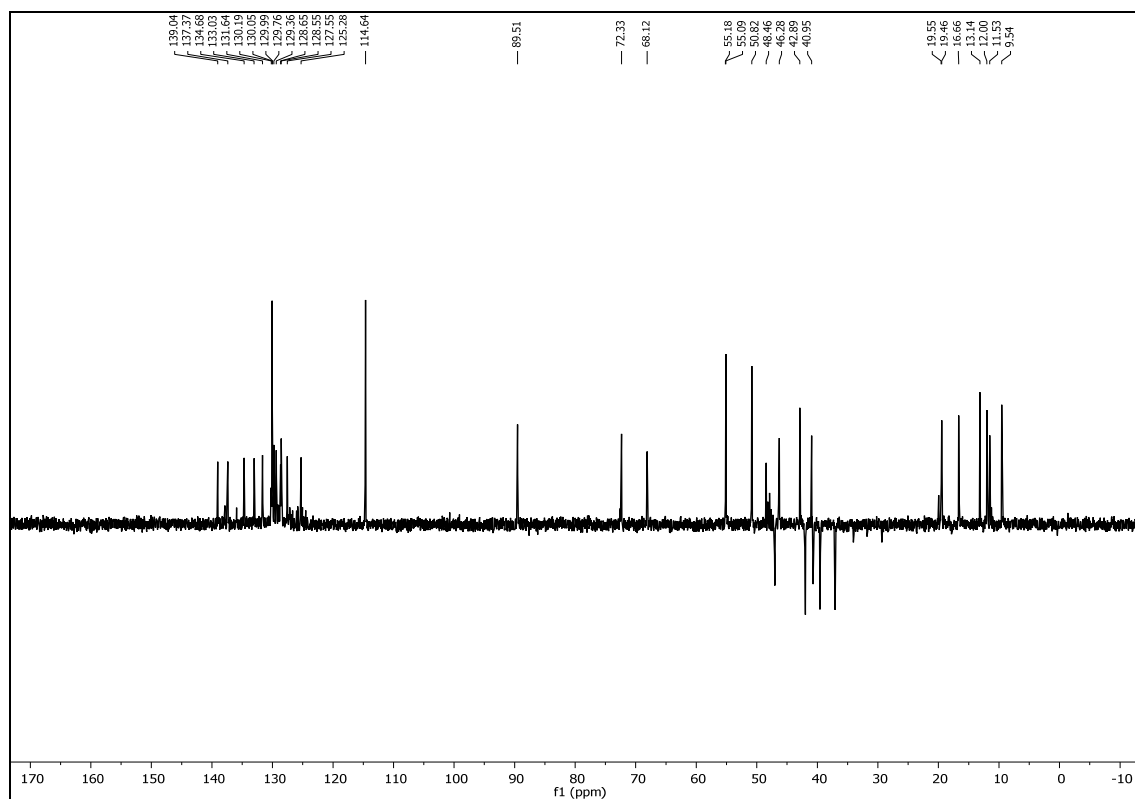

**COSY spectrum of compound 4 (300 MHz, MeOD-*d*<sub>4</sub>):**

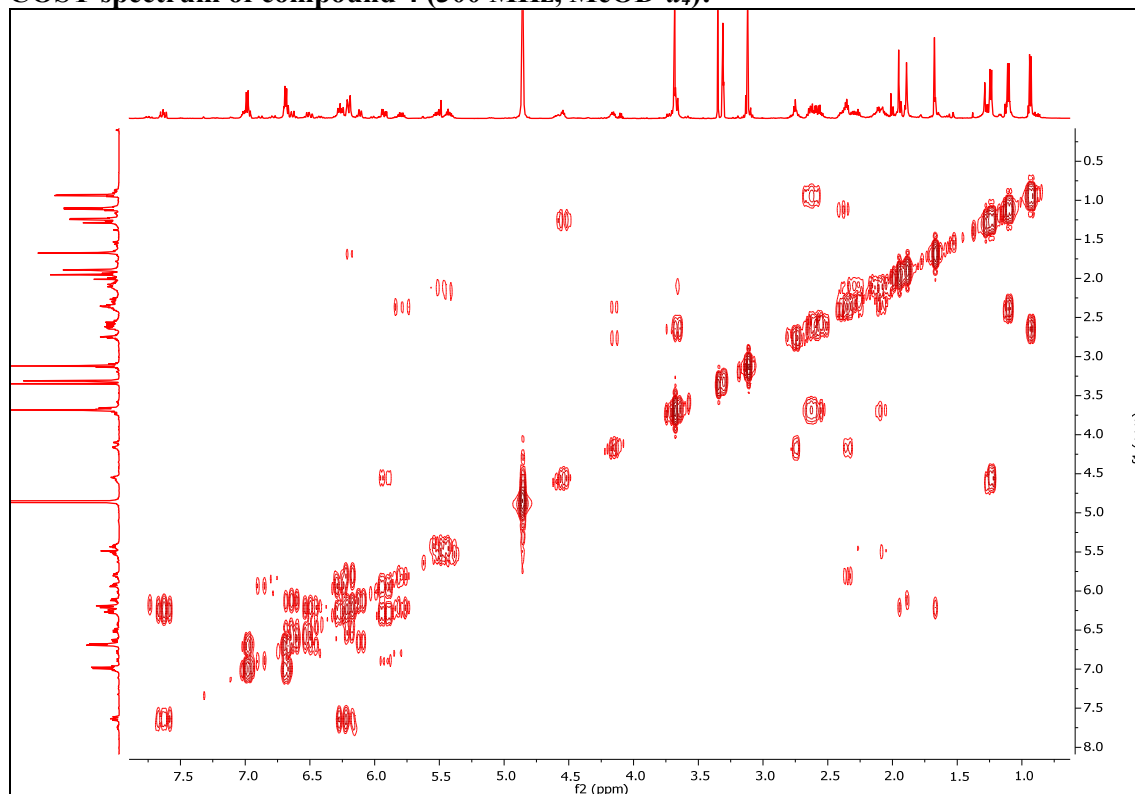

**NOESY spectrum of compound 4 (300 MHz, MeOD-*d*<sub>4</sub>):**

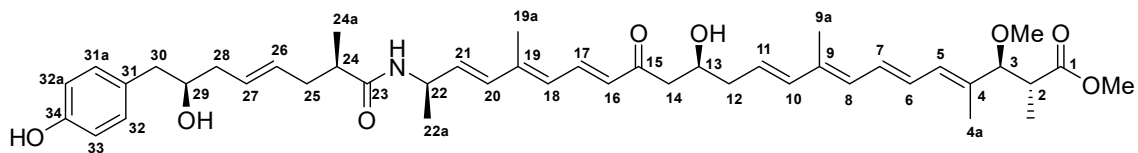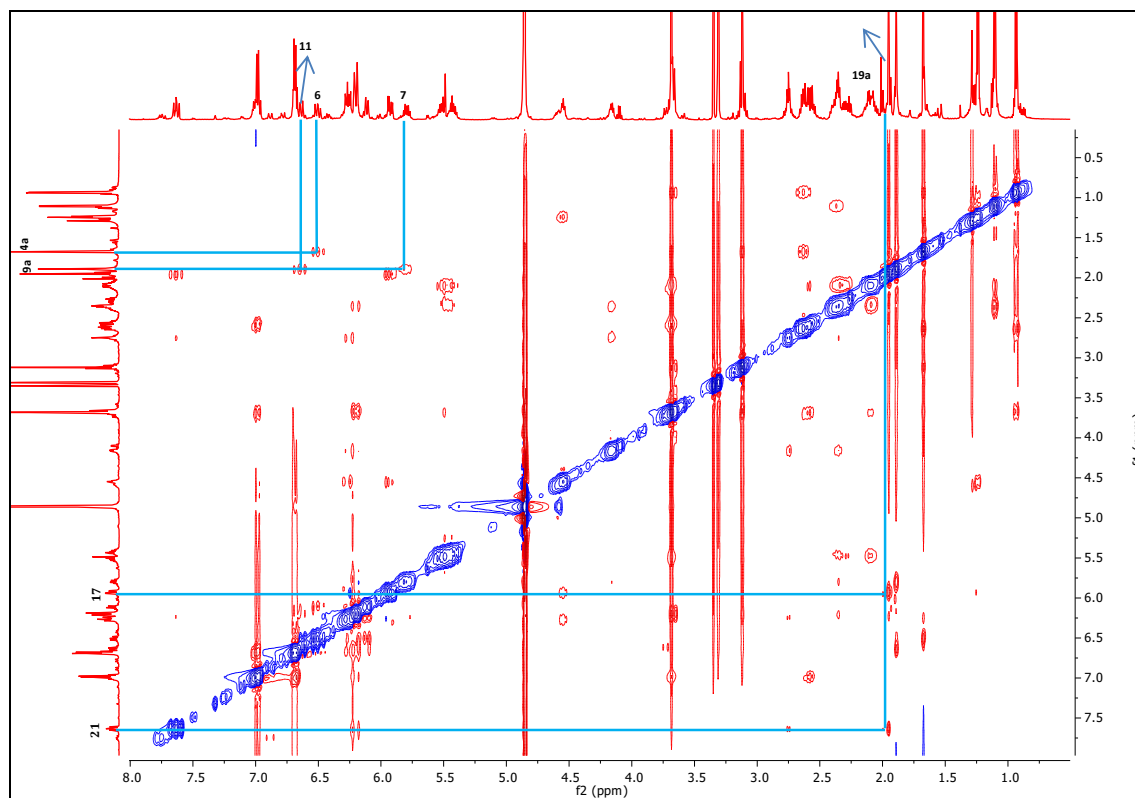

7

**HMBC spectrum of compound 4 (300 MHz, MeOD-*d*<sub>4</sub>):**

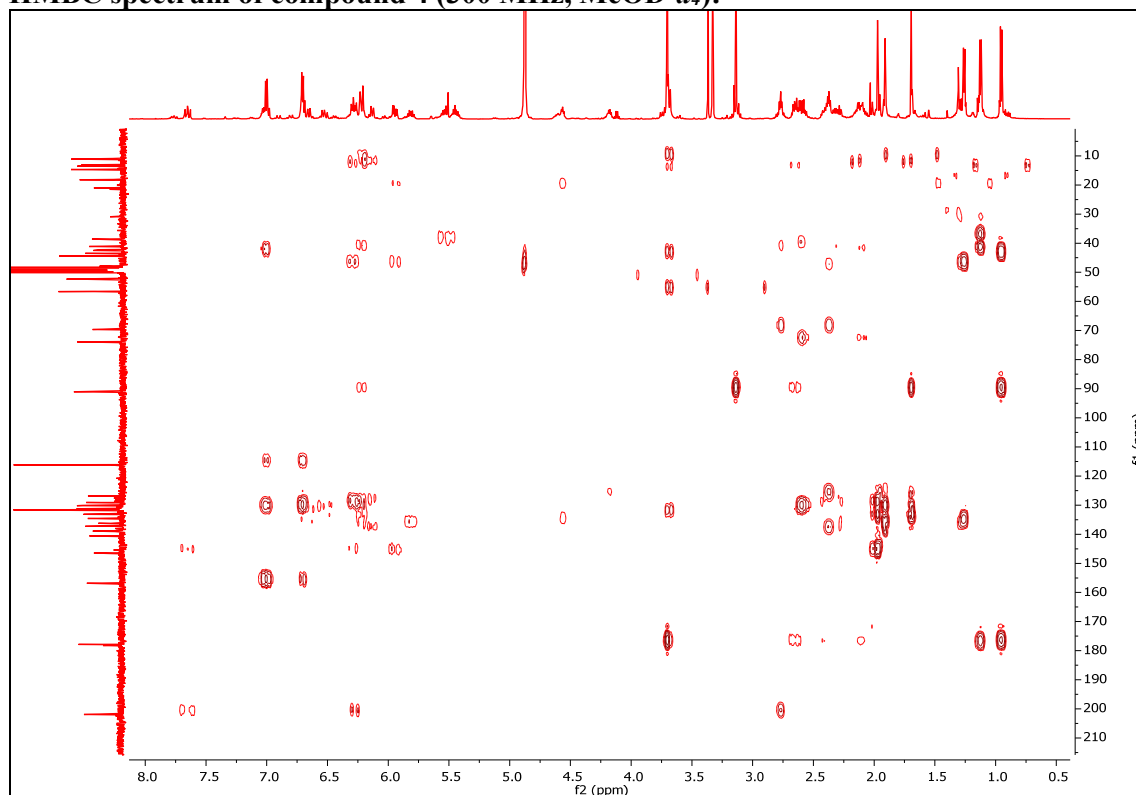

**HSQC spectrum of compound 4 (300 MHz, MeOD-*d*<sub>4</sub>):**

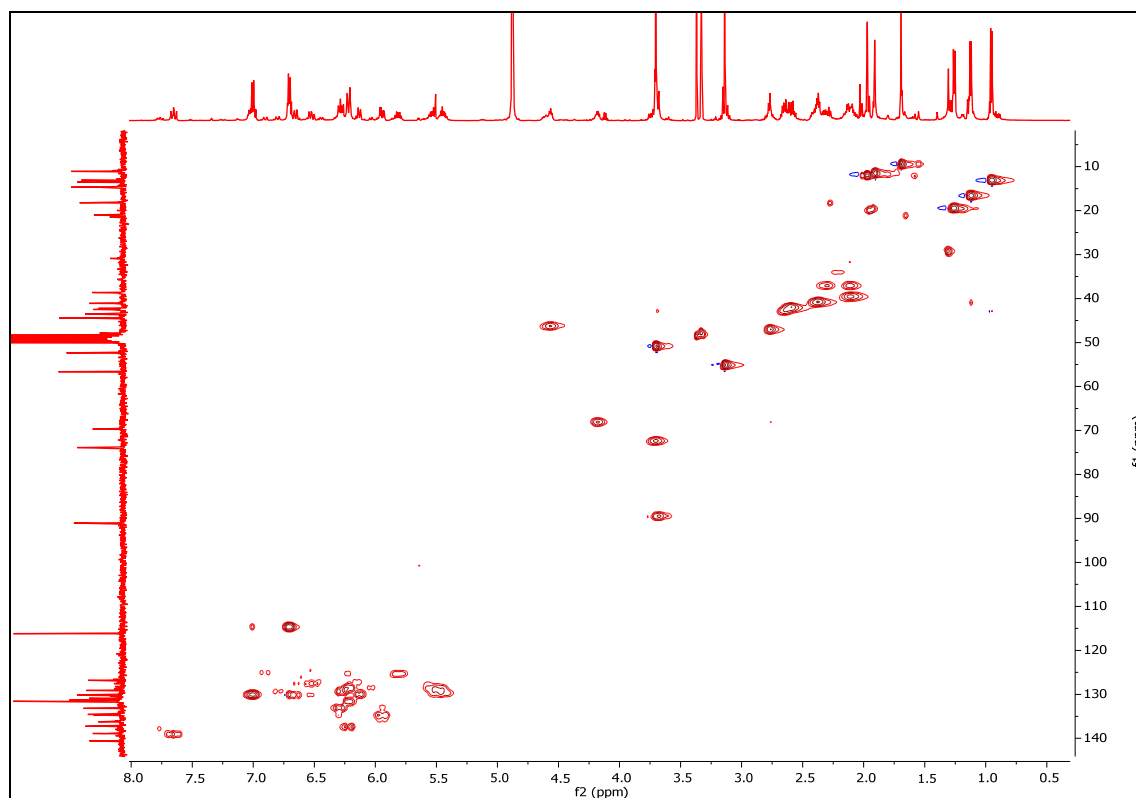

### HRMS spectrum of Thailandamide A Methyl Ester (4):

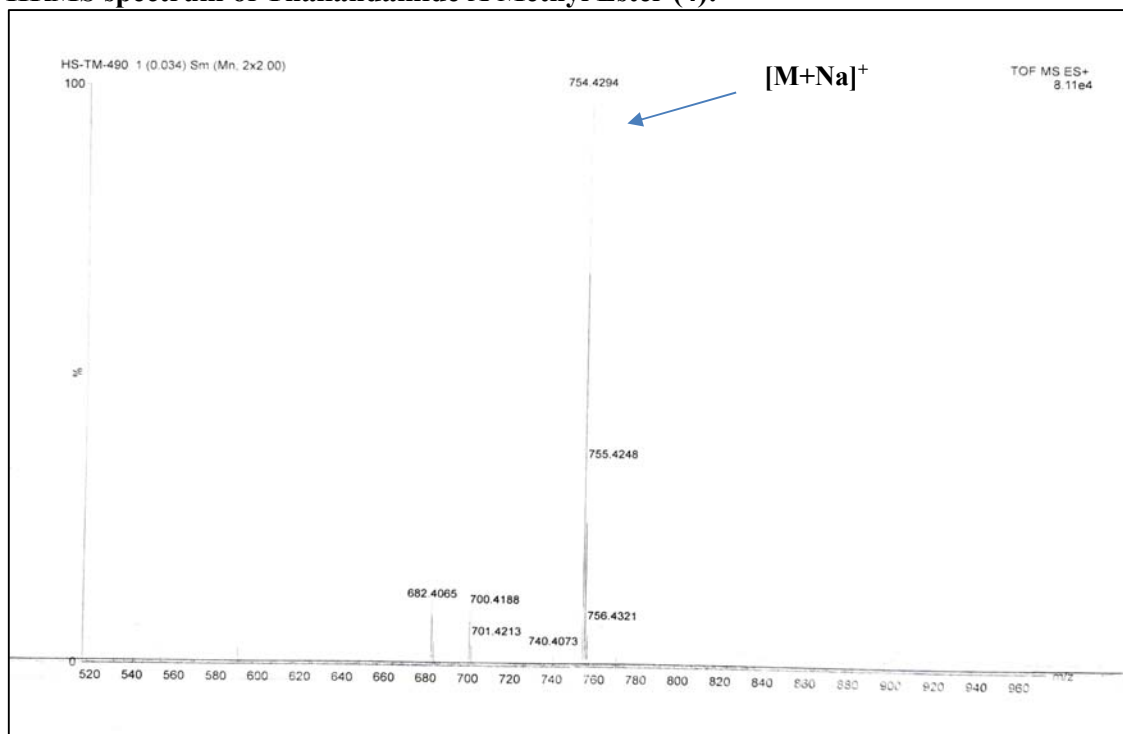

Supplement: d3ob02107f1.pdf [file d3ob02107f1.pdf]
